# Supplementary material for: Enabling immobilization and conversion of polysulfides through a nitrogen-doped carbon nanotubes/ultrathin MoS2 nanosheet core–shell architecture for lithium–sulfur batteries
Source: Royal Society of Chemistry journal article supplement (doi:10.1039/c9ta03227d), 2019-01-01
Supplement: c9ta03227d1.pdf [file c9ta03227d1.pdf]

**Enabling immobilization and conversion of polysulfides through  
nitrogen-doped carbon nanotubes/ultrathin MoS<sub>2</sub> nanosheets core-  
shell architecture for lithium-sulfur batteries**

Wu Yang,<sup>abc</sup> Wang Yang,<sup>abc</sup> Liubing Dong,<sup>b</sup> Xiaochun Gao,<sup>b</sup> Guoxiu Wang,<sup>\*b</sup>  
, Guangjie Shao<sup>\*ac</sup>

<sup>a</sup> State Key Laboratory of Metastable Materials Science and Technology, Yanshan  
University, Qinhuangdao 066004, China

<sup>b</sup> Centre for Clean Energy Technology, School of Mathematical and Physical Sciences,  
Faculty of Science, University of Technology Sydney, Broadway, Sydney, NSW 2007,  
Australia

<sup>c</sup> Hebei Key Laboratory of Applied Chemistry, College of Environmental and  
Chemical Engineering, Yanshan University, Qinhuangdao 066004, China

---

**\*Corresponding author:** E-mail address: shaoguangjie@ysu.edu.cn (G. Shao),  
guoxiu.wang@uts.edu.au (G. Wang).

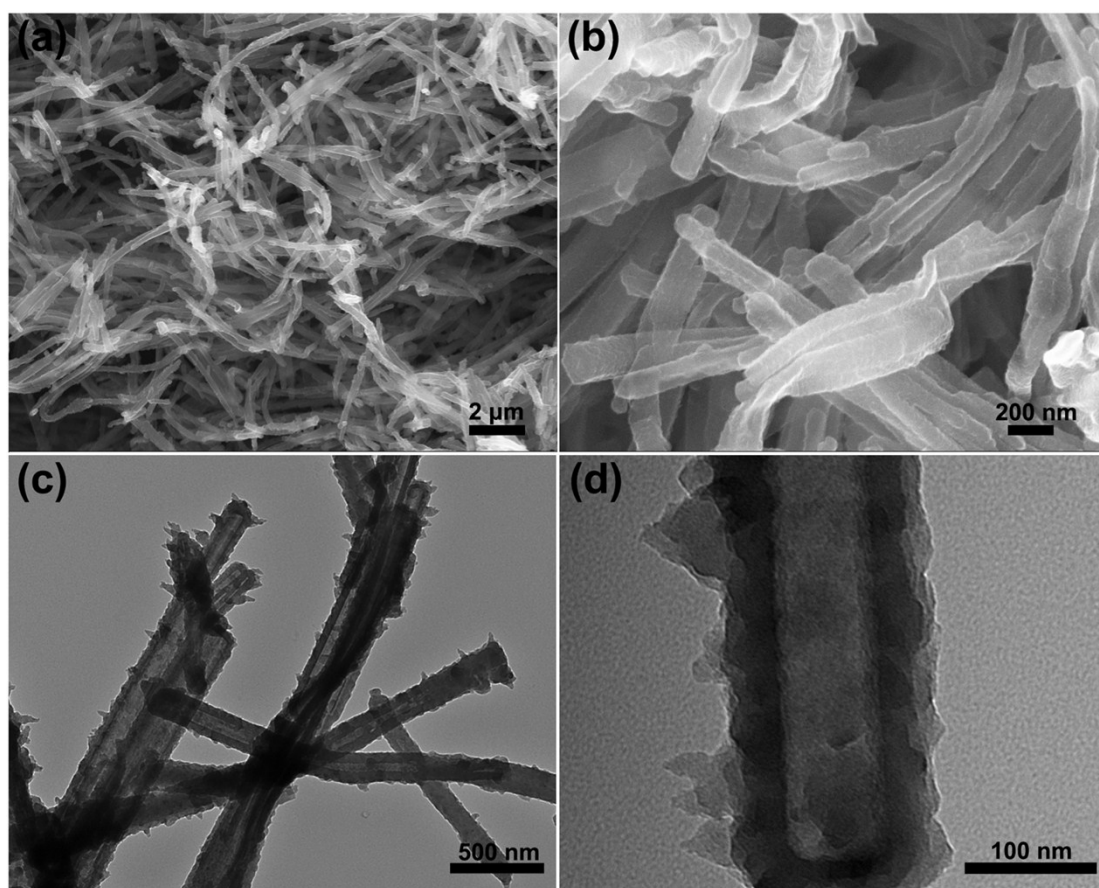

**Fig. S1.** SEM (a-b) and TEM (c-d) images of tubular PPy.

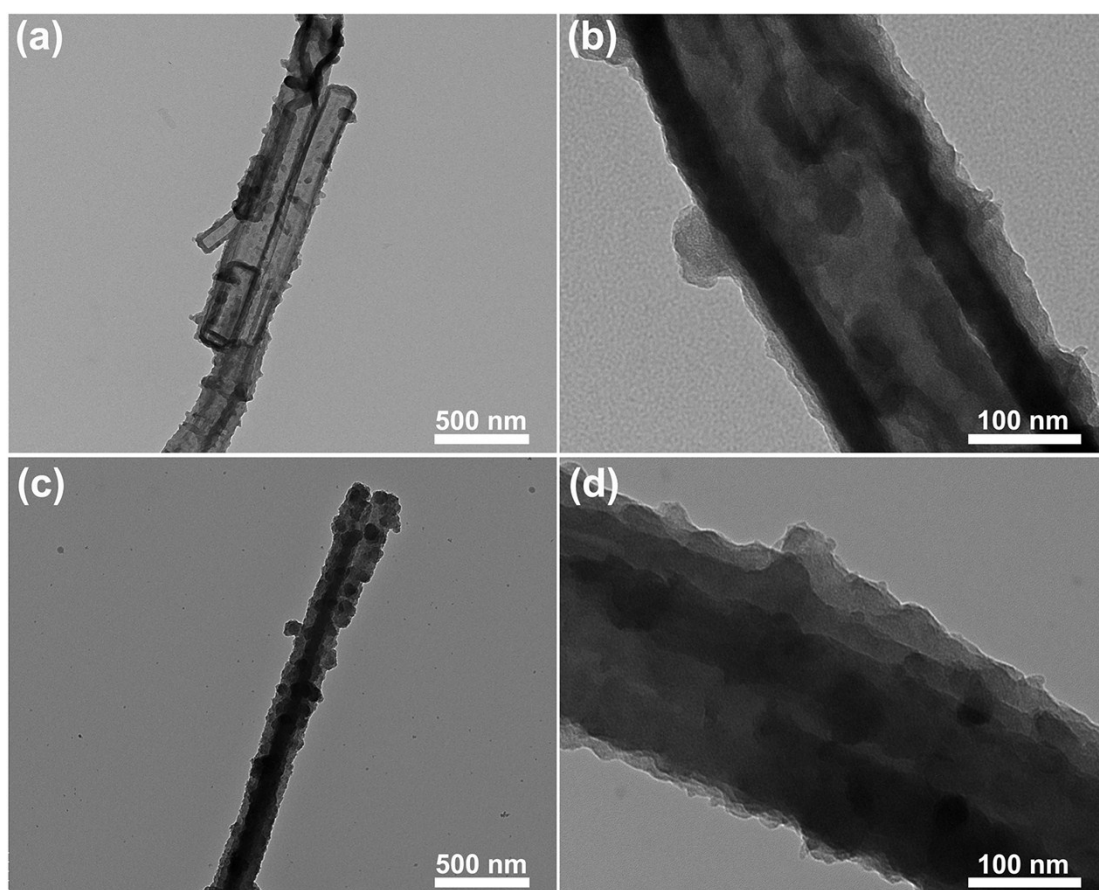

**Fig. S2.** TEM images of NC (a-b) and S-NC (c-d).

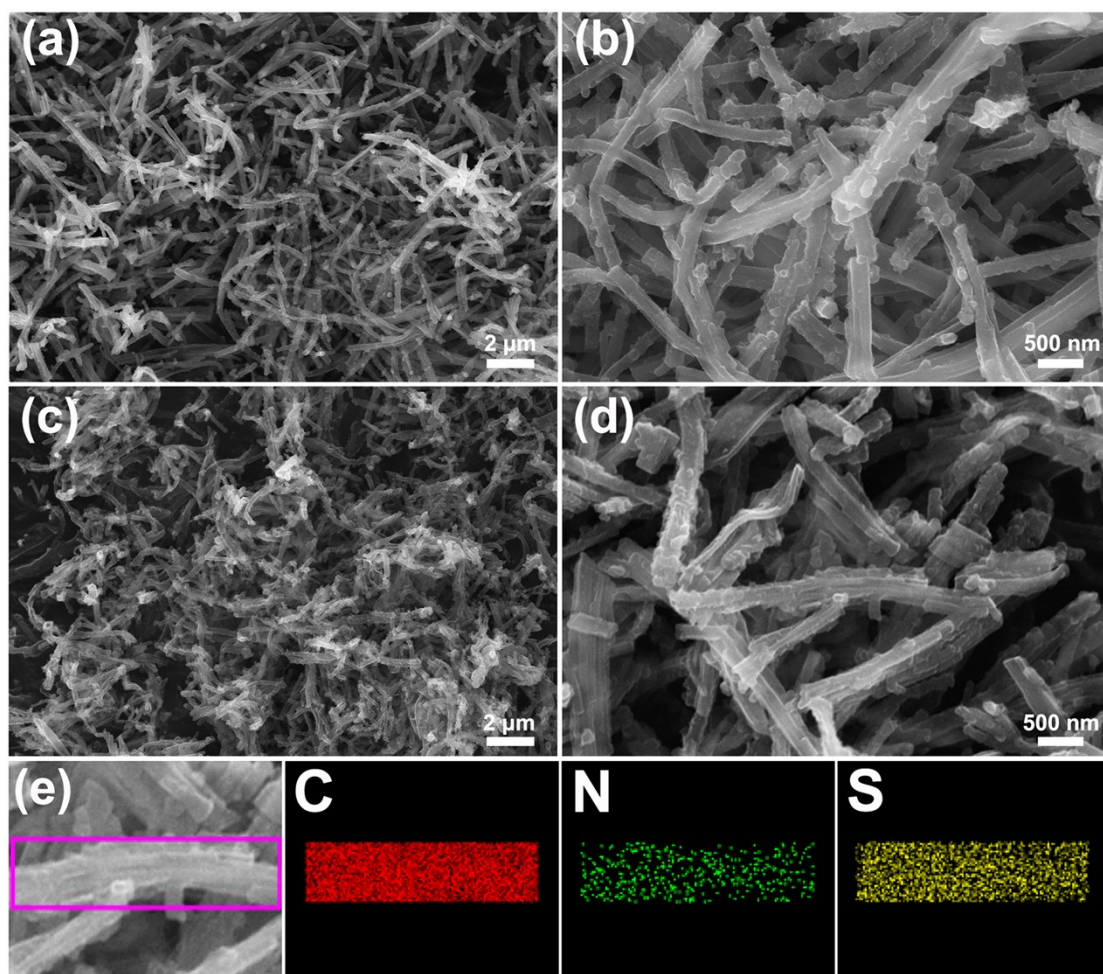

**Fig. S3.** SEM images of NC (a-b) and S-NC (c-d); High-magnification SEM image of S-NC and the corresponding EDS elemental mapping images of C, N, and S (e).

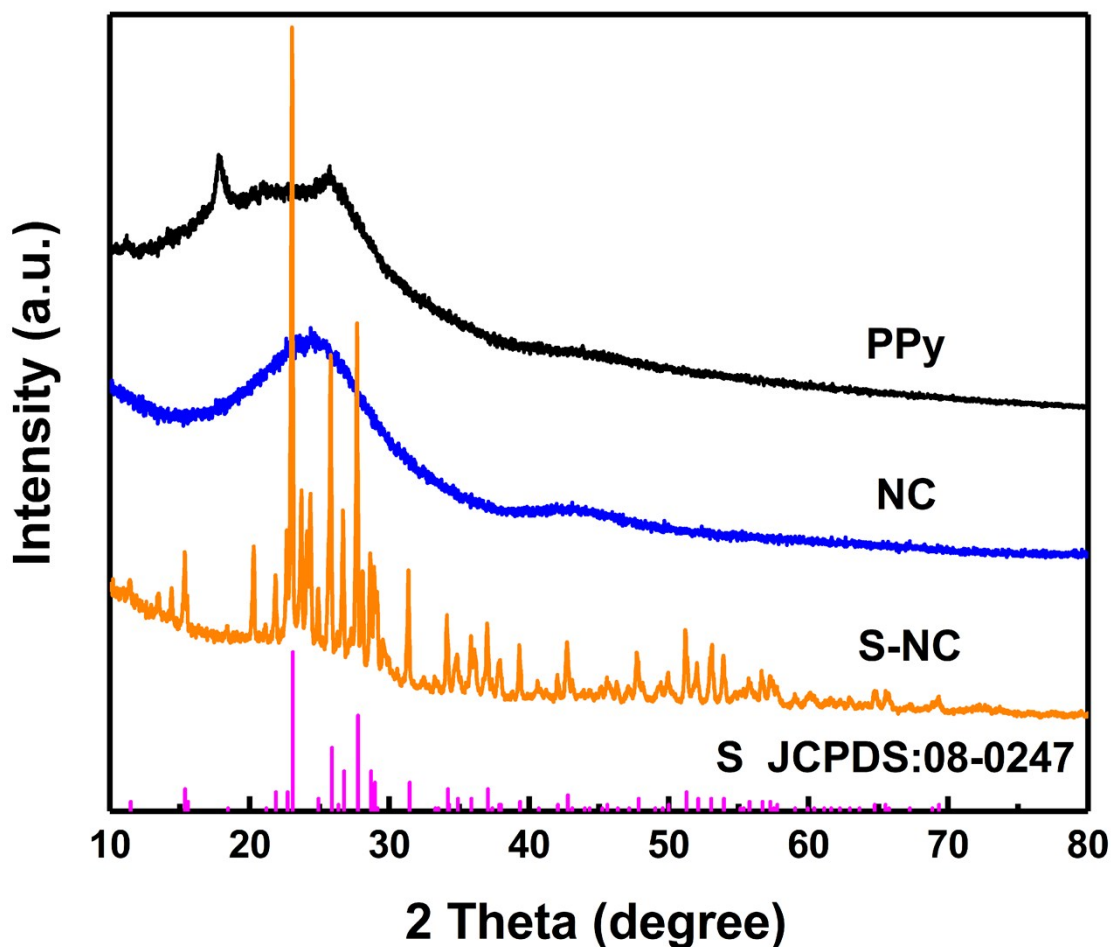

**Fig. S4.** XRD patterns of PPy, NC, and S-NC. Clearly, PPy has a broad and weak diffraction peak excepting two sharp diffraction peaks centered at  $18^\circ$  and  $26^\circ$ , indicating an amorphous structure and good electrical conductivity. After annealing, a broad diffraction peak centered at  $24^\circ$  and an inconspicuous peak centered at  $43^\circ$  of XRD patterns of NC were observed, corresponding to the periodically arranged (002) and (100) planes of the graphitic carbon. After sulfur impregnation, the sharp diffraction peaks centered at  $23.4^\circ$  and  $28.0^\circ$  match well with the (222) and (040) reflections of the orthorhombic phase sulfur (JCPDS No. 08-0247), implying that sulfur have successfully encapsulated into the internal cavity and surface of NC.

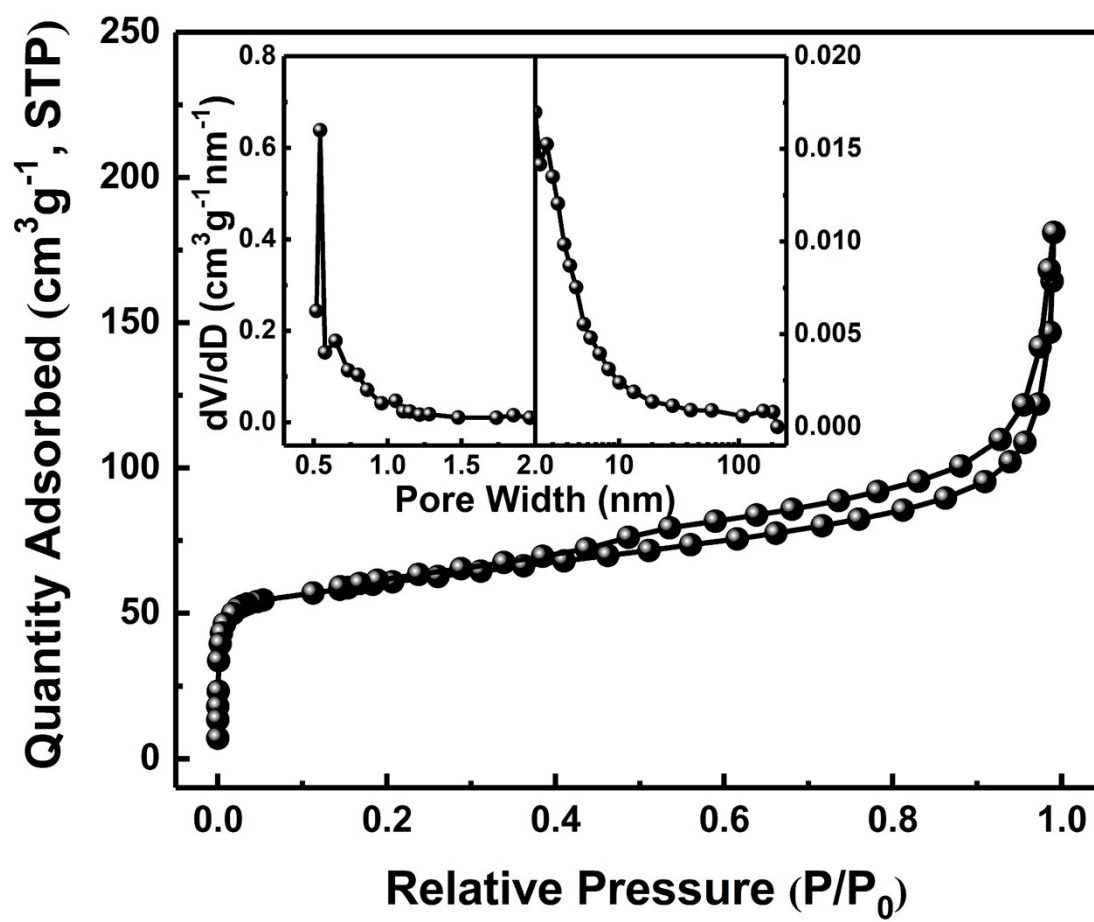

**Fig. S5.** Nitrogen adsorption-desorption isotherm of NC, and the inset shows the corresponding pore-size distribution.

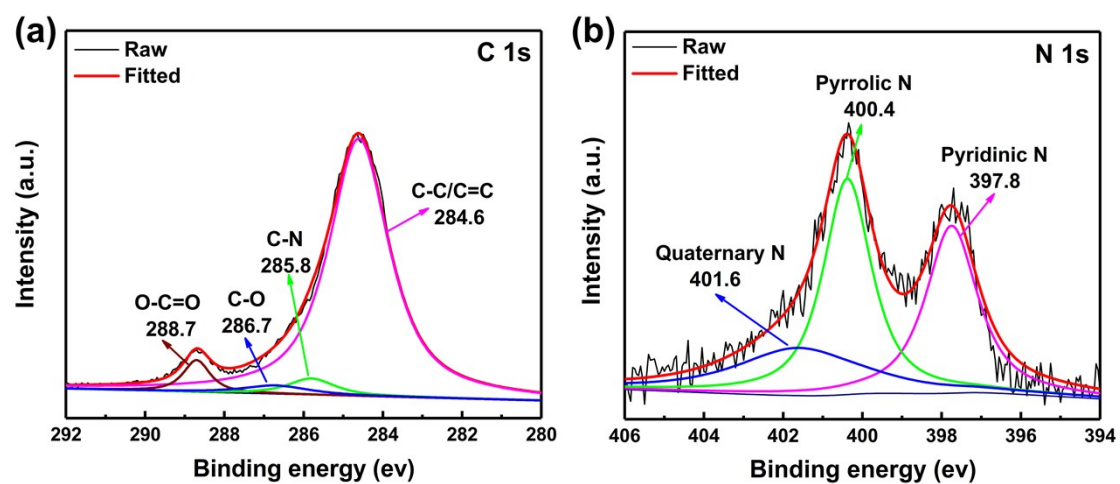

**Fig. S6.** C 1s (a) and N 1s (b) XPS spectra of NC.

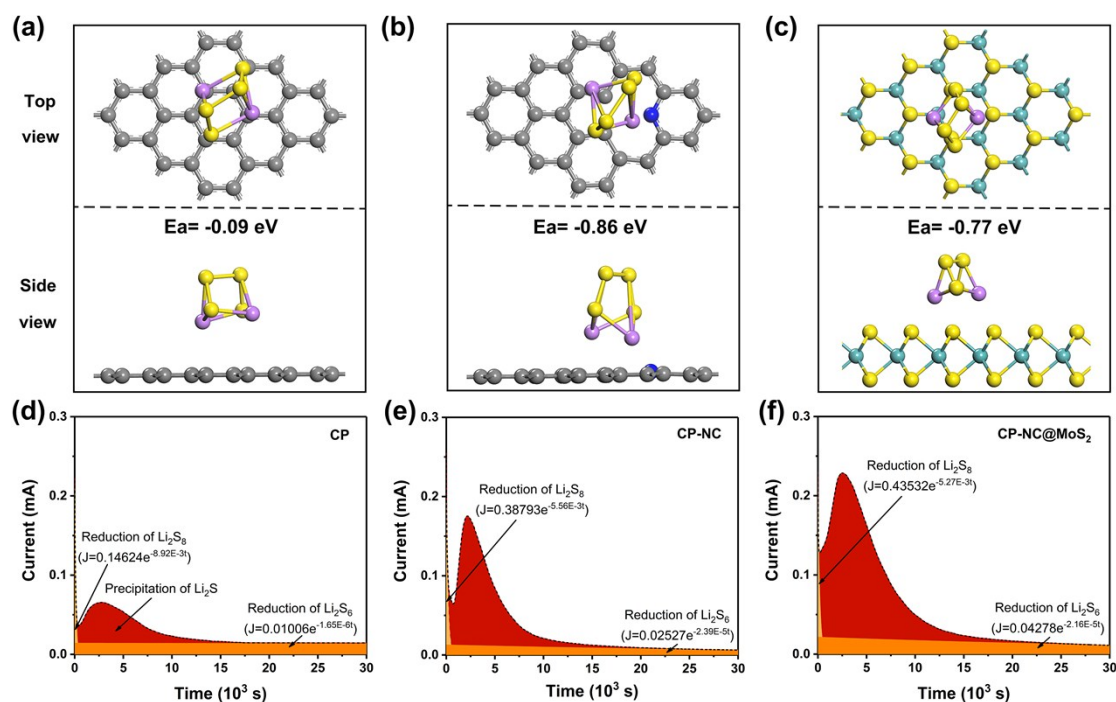

**Fig. S7.** Optimized geometries of  $\text{Li}_2\text{S}_4$  on (a) carbon matrix, (b) NC, and (c)  $\text{MoS}_2$  (001) surfaces; Fitting of current vs. time curve for potentiostatic discharge at 2.05 V on different surfaces: (d) CP, (e) CP-NC, and (f) CP-NC@ $\text{MoS}_2$ . The nucleation/growth rates of  $\text{Li}_2\text{S}$  on various surfaces were fitted according to Faraday's law, and the mathematical model is derived from Chiang and co-workers' previous work. Similarly, the potentiostatic discharge curve at 2.06 V was well fit by using the integration of two exponentially decaying curves, representing the reduction of  $\text{Li}_2\text{S}_8$  and  $\text{Li}_2\text{S}_6$ , respectively. When an overpotential of 0.01 V was applied,  $\text{Li}_2\text{S}$  nucleated, giving rise to extra contribution to the overall current. The capacity from  $\text{Li}_2\text{S}$  formation was obtained by subtracting the capacity of  $\text{Li}_2\text{S}_8/\text{Li}_2\text{S}_6$  reductions from overall capacities during the potentiostatic discharge curve. All the fitting results and parameters were listed in Fig. S7.

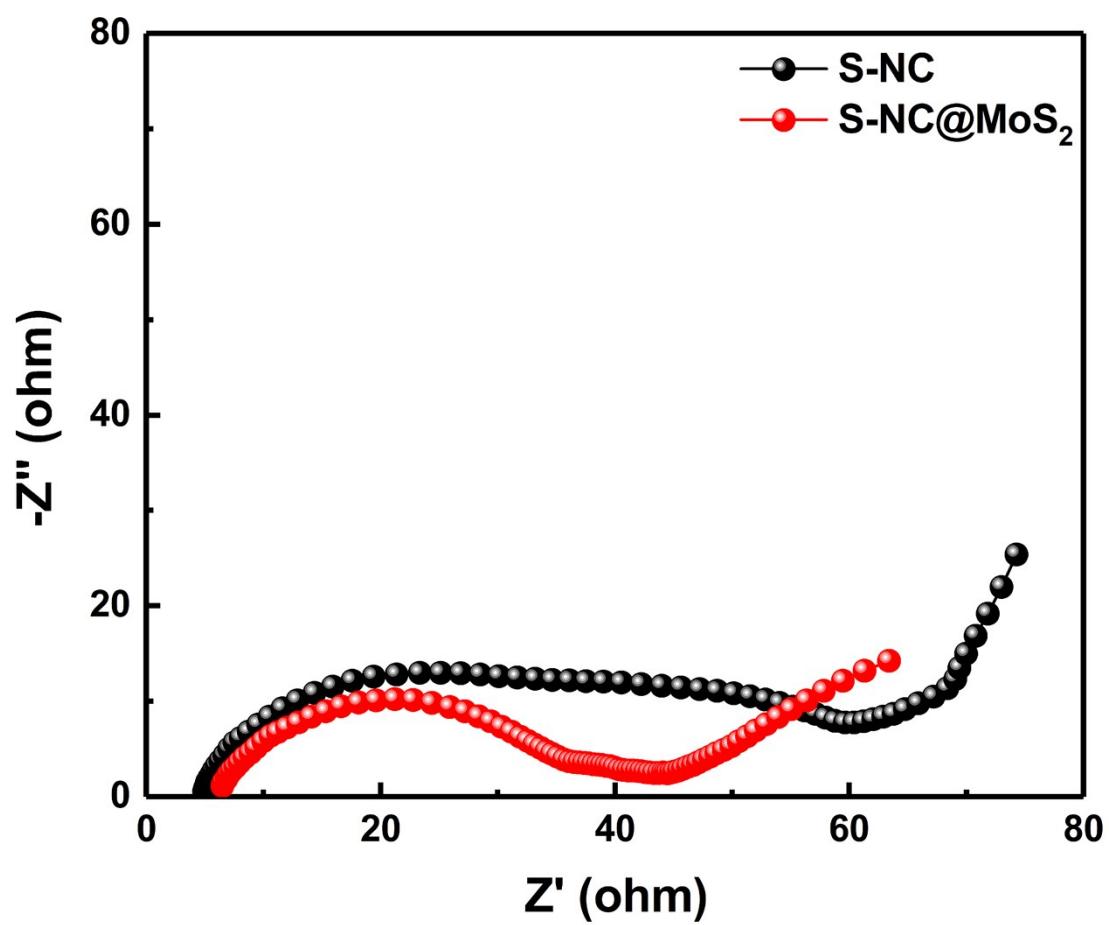

**Fig. S8.** Nyquist plots of S-NC@MoS<sub>2</sub> and S-NC cathodes before cycling.

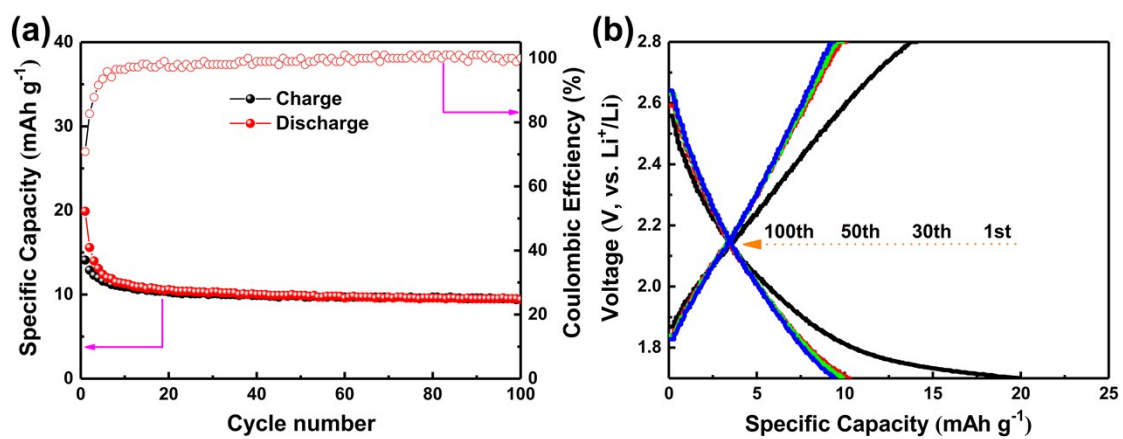

**Fig. S9.** Cycling performance (a) and charge/discharge profiles (b) of NC@MoS<sub>2</sub> electrode at 0.1 C.

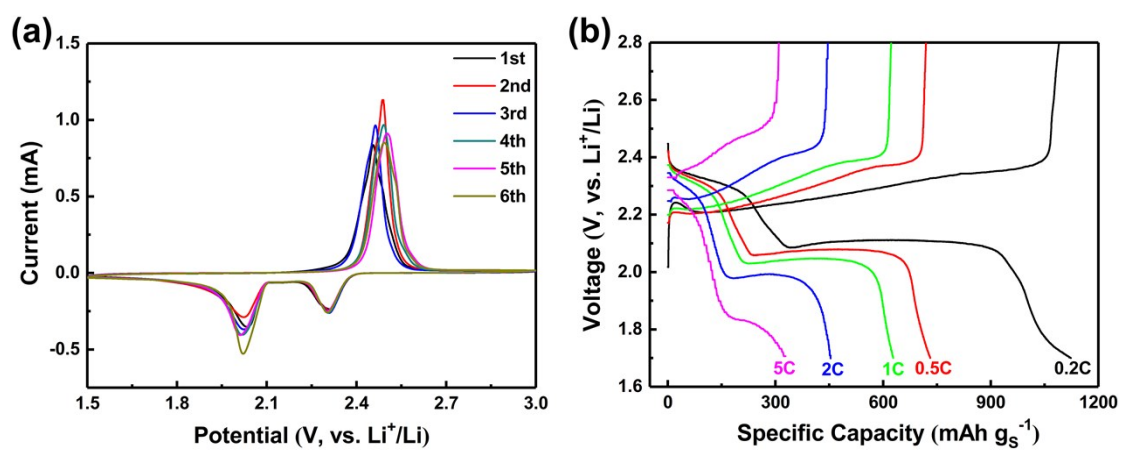

**Fig. S10.** CV curves of S-NC cathode (a); Charge/discharge profiles of S-NC cathode at various current densities between 0.2-5.0 C (b).

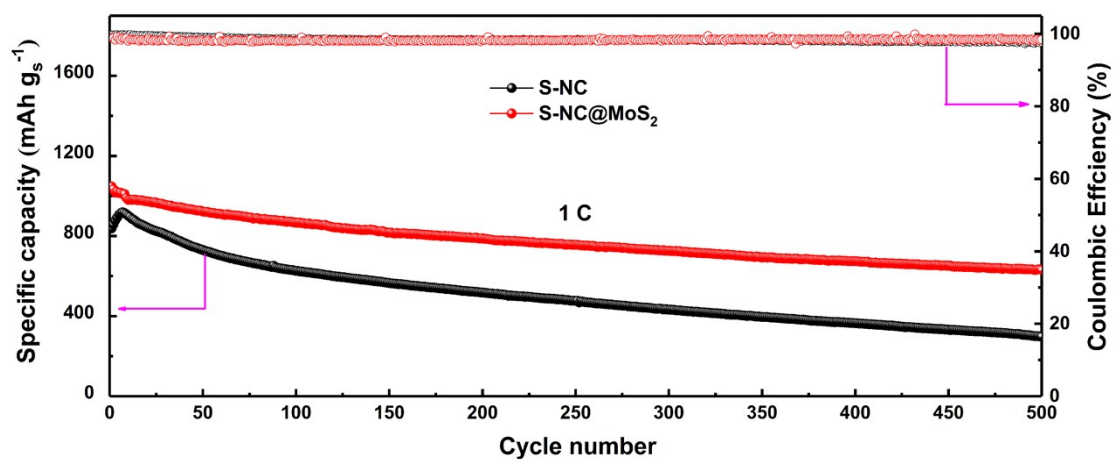

**Fig. S11.** Cycling performances and the corresponding Coulombic efficiencies of S-NC@MoS<sub>2</sub> and S-NC cathodes at 1 C.

**Table S1.** Electric conductivity of NC, MoS<sub>2</sub> and NC@MoS<sub>2</sub> measured at 7 MPa.

| Samples                                     | NC   | MoS <sub>2</sub> | NC@MoS <sub>2</sub> |
|---------------------------------------------|------|------------------|---------------------|
| Electric conductivity (S cm <sup>-1</sup> ) | 1.23 | 0.05             | 0.56                |

**Table S2.** BET surface area, porosity parameters and chemical composition of NC and NC@MoS<sub>2</sub>.

| Sample              | $S_{\text{BET}}$<br>(m <sup>2</sup> g <sup>-1</sup> ) | $S_{\text{meso}}$<br>(m <sup>2</sup> g <sup>-1</sup> ) | $V_t$<br>(cm <sup>3</sup> g <sup>-1</sup> ) | $D_p$<br>(nm) | XPS (at.%) |      |       |      |
|---------------------|-------------------------------------------------------|--------------------------------------------------------|---------------------------------------------|---------------|------------|------|-------|------|
|                     |                                                       |                                                        |                                             |               | C          | N    | Mo    | S    |
| NC                  | 248                                                   | 66                                                     | 0.28                                        | 4.89          | 85.21      | 5.24 | -     | -    |
| NC@MoS <sub>2</sub> | 29                                                    | 23                                                     | 0.23                                        | 42.6          | 79.31      | 5.11 | 12.46 | 3.13 |

$S_{\text{BET}}$ - BET surface area,  $S_{\text{meso}}$  - BJH Adsorption cumulative surface area,  $V_t$  - total pore volume,  $d_p$

-Total adsorption average pore width.
